# Supplementary material for: Designing for Deliberative Goal-Based Decision Making in Environments with Rare Adverse Events—An Experimental Study
Source: Atypon-hosted journal article supplement (doi:10.1287/orsc.2016.1095), 2016-12-01
Supplement: orsc.2016.1095-sm.pdf [file orsc.2016.1095-sm.pdf]

## **A. A Procedural Note**

The experiment started with an instructor reading out the text of the instructions given below. Additionally the participants received the same text in booklet form and were asked to take this to their computer cubicle so that they could refer to it as and when necessary.

Participants who became insolvent in the experiment were instructed to remain seated until called to proceed to the payoff desk in a separate room. This discharge process began only after the majority of participants had finished the experiment. Those leaving the room were required to do so quietly, one at a time. Participants obliged to wait were granted access to the internet, but we ensured that communication could not take place, by any means, between those who had finished and those still completing the game.

## **B. English Translation of the Experiment Instructions (Goal Format)**

Welcome to the experiment! The experiment in which you are going to be taking part today typically does not last more than an hour and a half. Approximately 30 minutes of this is taken up by the oral instructions, in which you will learn what you need to know for the experiment. You will find a printed transcript of the instructions in front of you. Please note that you must not take these instructions with you after the experiment. You may ask questions during the oral presentation of the instructions. To guarantee the same conditions for all participants, however, we must limit ourselves to providing you only with the amount of information originally planned. After the end of the experiment, please remain in your seat until a supervisor has noted down your payoff on a receipt and asks you to leave.

### **B.1 Overview**

The context of today's experiment is a planning situation in a financial institution. Imagine that you are the chief manager of a financial institution. The experiment runs through a maximum of 60 periods, in each of which you will be taking decisions. Your game may last less than 60 periods as it is possible for your financial institution to become insolvent in the course of the 60 periods. If this happens, the experiment is over for you.

Your task is to pursue a business policy which is successful, from a financial point of view, for your financial institution. Accordingly, you will receive a performance-related payoff based on the financial success of your policy, composed as follows:

- Should your financial institution remain solvent up to and including the 60th period, the payoff basis which determines your performance-related payoff will equal the sum of the period profits over the 60 periods. Please note that the term 'period profit' can also refer to negative numbers, i.e. losses.
- Should your financial institution become insolvent, the payoff basis will be reduced to 25% of

the sum of period profits. Period profits achieved up to and including the last period played, i.e the insolvency period, will count toward it.

If your payoff basis is positive, you will receive €0.05 per unit. If not, your performance-related payoff is €0. You will in any case receive an additional fixed amount of €8 for taking part.

In today's experiment you will not be playing with or against other participants. Your decisions have no influence whatsoever on either other participants' decision situations or their payoffs.

## **B.2 The Decision Problem.**

### **B.2.1 Capital Stock and Borrowing.**

The financial institution's capital consists of **equity capital** and **debt capital**. At the beginning of the experiment the equity capital is 100 units and this amount will never be exceeded in the course of the experiment. However, the amount of equity capital in the next period can be influenced by the profits of the present period.

- If the period profit is negative, the equity of the financial institution you are managing will be reduced by this amount in the next period.
- A positive profit only increases the equity when the latter is below the 100-unit limit. In this case, the profit is added to the equity of the next period, but only up to the amount necessary to restore the maximum total of 100 units. Any profit in excess of this amount is distributed to shareholders as a dividend.

There being no participants in the experiment corresponding to the shareholders, the dividend payments are only a formal device. As it is always the period profit before any adjustment of equity capital or distribution of dividends which counts toward your payoff basis, these transactions have no effect on the contribution of the relevant period to your payoff. Debt capital can be borrowed in any period at a fixed interest rate of 3.5%. Debt capital can only be borrowed for the duration of a single period. At the end of each period the full amount of the loan must be paid back with interest. The maximum amount of debt capital available in each period is triple the amount of current equity, with a minimum of forty units. You can borrow as much debt capital as you want up to the maximum amount available.

### **B.2.2 Use of Capital (Investment Projects).**

Your financial institution faces a demand for funding for many separate investment projects. Your operational departments categorize the investment projects in one of two categories, termed A and B, such that investment projects of the same category have a similar or equal risk of failure. Category A investment projects have a lower risk of failure than Category B projects. Under Category B you might imagine such projects as the financing of start-ups. Accordingly, investment projects in Category B have a higher nominal return than projects in Category A, as follows:

$r_A = 0.11$  (11%) and  $r_B = 0.25$  (25%). As with the debt capital, the maturity of both investment categories is only one period. There are always enough projects for you to be able to invest all the capital at your disposal.

Capital can not only be used for financing investment projects but also be held in reserve. Capital kept in reserve earns no interest. Any reserves held are dissolved at the end of each period.

### B.2.3 Failure of Investment Projects.

Not all of the investment projects you finance will succeed. Some will fail. In the case of failure you will lose the total value of the particular investment project. Since your capital is spread over numerous projects in each category, only a certain proportion of the investment volume will be lost. Default rate  $d_i$  denotes the proportion of capital volume invested in Category  $i$  which is lost in a given period.

$$d_i = \frac{\text{Volume lost } (i)}{\text{Volume invested } (i)}, i \in \{A, B\} \quad (\text{B.1})$$

A default rate of  $d_i$  means that  $d_i \cdot 100\%$  of the volume invested in Category  $i$  has been lost.

The default rates depend not only on the project category but also on the prevailing state of the economy in a given period. There are two states, called **normal state**, and **state of crisis**.

- In a normal state the default rate averages 6% for Category A and 14% for Category B with a small variance in each case.
- All you know about the default rates in a state of crisis is that in both categories they are several times higher than in the normal state. The factor by which the default rates increase is identical for both categories. This increase factor is not necessarily a whole number. It does not change from one crisis to another. However, since also in a crisis state the default rates have some variance, the realizations of the default rates in a state of crisis can differ slightly from crisis to crisis within the category.

The experiment has been so configured that with a very high probability you will encounter at least one crisis period over the course of the experiment; the probability that more than two crisis periods will occur is rather low. The state of crisis lasts only for one period. It is possible, though accordingly unlikely, that two crises occur in two successive periods.

At the point when you take your investment decision for a given period you do not know in which state the economy will be. In our experiment there are no indications whatsoever in the previous periods that a crisis is about to occur. Nor is the occurrence of a crisis in any way dependent on your own decisions in the course of the experiment. You can only establish whether a state of crisis has occurred by reference, at the beginning of the following period, to the default rates realized.

The computer sets the state of the economy using a random process which is identical for all participants. Here it should be noted that although the process is identical for all, the state of the economy in any given period is individually determined for each participant. For this reason, you cannot gain any relevant information about the course of your own game from the fact that

another participant experienced a crisis in a specific period. Amongst all participants, the crises are distributed more or less evenly over the periods.

### B.2.4 Returns, Profits and Insolvency.

The formulas for calculating the returns and profits and the insolvency rule will now be explained to you. The corresponding values for past periods are calculated by the software and made available to you on the information page. You can use these formulas to check at will the values on the information page or to make your decision.

Given the default rates  $d_A$  and  $d_B$  the total capital repayments and returns  $R(d_A, d_B)$  from the investment volumes  $x_A$  and  $x_B$  and the return rates  $r_A = 0.11$  and  $r_B = 0.25$  are calculated in the following way:

$$R(d_A, d_B) = x_A \cdot 1.11 \cdot (1 - d_A) + x_B \cdot 1.25 \cdot (1 - d_B). \quad (\text{B.2})$$

Thus with the default rates  $d_A$  and  $d_B$  the **profit** is calculated from the corresponding total capital repayments and returns plus the retained reserves  $x_{Res}$ , less the repayment of borrowed capital with interest and less the equity at the beginning of the period as follows:

$$\Pi(d_A, d_B) = R(d_A, d_B) + x_{Res} - DebtCap \cdot 1.035 - Equity \quad (\text{B.3})$$

Your financial institution remains solvent as long as the equity suffices to cover losses, i.e.

$$Equity + \Pi \geq 0. \quad (\text{B.4})$$

Should insolvency occur at the end of a period **the experiment has finished for you**. Note that the solvency condition B.4 refers to the relevant period values and previous profits have no cushioning effect.

### B.3 Procedure for the Period Decision.

In this section you will learn in detail how the investment and financing structure of your financial institution is determined for any given period. The investment and financing structure comprises the investment volumes for the categories A and B, the reserves, and the amount of capital borrowed. You do not set these numbers directly. Instead, you set targets for profit and safety to be achieved by your financial institution in the current period which implicitly determine these numbers.

- The experiment software checks whether your targets are feasible and informs you of the existence of any room for improvement in any of the targets. If there is room for improvement you can exhaust this according to your priorities.
- The experiment software automatically determines the investment and financing structure which realizes your targets for the given period.

You can imagine the experiment software as an operational department which in each period checks the feasibility of your targets and translates the targets you eventually set into a corresponding investment and financing structure.

### B.3.1 Specifying your Targets.

In each period you specify your targets by entering target values for three variables into the corresponding fields of the decision interface (see Fig. B.1). Below these fields you can always see the amount of equity available in the current period.

The screenshot shows a software interface with two tabs: "Plan for the current period" (selected) and "Information about past periods". The main content area is titled "Your targets" and contains three sections:

- Normal profit:** "Which minimum profit should be achieved in the current period if the normal state obtains?" with an input field and "PU" label.
- Crisis profit:** "Which minimum profit should be achieved in the current period if the crisis state obtains?" with an input field and "PU" label.
- Increase factor:** "Which maximum default rate increase factor in a crisis state should the financial institution plan for?" with an input field. Below it are two smaller input fields labeled "Maximum default rate A:" and "Maximum default rate B:".

At the bottom right of the target area, it says "Equity base for the current period: 100.00". Below the target area are two yellow buttons: "Check feasibility" and "Proceed to the next period". The interface footer includes an "ADMIN" button, a refresh icon, and "Period 1 of 60".

Figure B.1: Screenshot of the decision interface (goal format).

The three variables for which you specify target values are:

**Normal profit:** *The minimum profit to be achieved in the current period if the normal state obtains.*

From Equation B.3 you can see that the profit depends on the default rates—a profit target can therefore only be set assuming certain default rates. In the case of your target for normal profit, the planning department calculates on the basis of the known mean default rates for the normal state ( $d_A = 0.06$  and  $d_B = 0.14$ , i.e. 6% and 14%). If in the corresponding period the normal state obtains, the realized profit will typically deviate from your target slightly, because the realized default rates deviate slightly from the respective mean values. If the state of crisis obtains in the corresponding period, your target value for normal profit will be missed by a significant amount, as the default rates will then be several times higher.

**Crisis Profit:** *Minimum profit to be achieved in the current period if a crisis state obtains.*

It is admissible for your target value for the crisis profit to be negative. This is then equivalent to the target of not letting the loss in the case of a crisis exceed a certain value. Please note that, according to Equation B.4, with equity of 100 the crisis profit must be equal to, or greater than,  $-100$  to ensure solvency in the corresponding period (don't forget: greater than  $-100$  is, for example,  $-95!$ ).

As with the normal profit a target for the crisis profit can only be set by assuming certain default rates. However, whereas for the normal state the default rates are known from experience, the planning department does not know how high to set them for the crisis state. Accordingly, for the implementation of your target values for the crisis profit the planning department still needs a guideline for the maximum increase in default rates with which it should plan for the state of crisis. Consequently, the third target you set concerns the following variable.

**Increase Factor:** *By this we mean the maximum factor by which the default rates increase to be planned for by the planning department for the event of a crisis state.*

For example, if the planning department is to plan for at most a doubling of the default rates, the increase factor would be 2; if it is to plan for at most a tripling, it would be three, etc. The factor need not be a whole number, however. After you have entered the target for the increase factor to be planned for, the software automatically shows the resulting maximum default rates in the two fields immediately below (for example, with an increase factor of 2 the maximum default rates to be planned for are 12% for A and 28% for B; with an increase factor of 3, the corresponding values are 18% for A and 42% for B, etc.).

By specifying maximum default rates to be planned for, of course, you cannot influence the actual default rates in a crisis, as these are determined at the macroeconomic level.

Finally, one important remark concerning the relationship between your targets for the crisis profit and for the maximum default rates to be planned for:

- If in a crisis state the default rates are higher than the maximum default rates planned for, the realized profit will be smaller than your target value for the Crisis Profit. This means, that your target for the Crisis Profit will not be met.
- If in a crisis state the default rates are lower than the maximum default rates planned for, the realized profit will actually be greater than your target value for the crisis profit. Your target for the crisis profit will therefore be exceeded.

This means that the higher you specify the maximum default rates to be planned for, the more robust your target for the crisis profit will be. For instance, when you set as a basis for planning the default of all investments in Category B—corresponding to an increase factor of 7.1—your target value for the crisis profit will always be achieved, because the realized default rates in both categories can then not be higher.

### B.3.2 Checking the Feasibility of your Targets and any Potential Room for Improvement.

You cannot, of course, simultaneously set targets of unlimited magnitude for the safety and profit of your financial institution. Also, the three targets are interdependent. For example, the higher the target you set for the crisis profit, the lower will be the potential for profit in the normal state (given a certain target for the increase factor). It is equally true that the greater the target you set for the increase factor, the lower the potential for profit in the normal state (given a certain target for the crisis profit). These relations arise because setting higher targets for safety entails a balance sheet with lower borrowing and/or fewer investments in the riskier, but in the normal state more profitable, Category B.

The first question which then arises is whether the target values you have selected are **jointly** feasible, i.e. whether—given the capital available and the investment alternatives—it is possible to devise a balance sheet which simultaneously realizes all targets. It is possible for all your targets to be jointly feasible and for there still to be potential for one or more of the targets to be increased without having to lower the others. This check of feasibility and any potential room for improvement is carried out automatically by the software when you click on the yellow key marked *Feasibility Check*. You then receive one of three possible responses:

- *Your targets are not jointly feasible.*

In this case you change one or more target values and submit the new target system to another feasibility check.

- *All targets are jointly feasible and there is still potential for improvement of at least one of the specified target values.*

You can inquire about the potential for improvement for each individual variable by pressing the corresponding key in the dialogue box. Note that the highest possible value for each variable is established separately under the constraint that the other specified targets can still be attained. This implies that all three variables cannot be simultaneously set at the respective highest value established by the software. If you change the target value in any of the variables toward the highest value reported, this will typically reduce the potential for improvement for the other targets. When you do not want to inquire any further about the potential for improvement, go back to the decision interface and change the targets as desired.

- *Your target values are jointly feasible and there is no potential for improving any of the targets set.*

In this case, the field *Proceed to the next period* is activated. If it is clicked, the software moves on to the next period, automatically calculating the realizations of all business figures. Alternatively, you can again rethink and change your target values.

**Note that only in the third case can you proceed to the next period.**

### B.3.3 The Information Page.

In addition to the decision interface, the experiment software also features a second interface providing access to your financial institution's business figures in past periods. You reach this interface by clicking on the tab *Information about Past Periods*. A table then appears. The first three columns after the period number contain the target values you specified in each individual period. The next column shows the period values for Equity; in the subsequent six columns you will see the relevant period values for the default rates in the categories A and B, total capital repayments and returns according to Equation B.2, the return on assets (ROA), the profit and the accumulated profit. The ROA is the profit from a period plus the interests divided by the total capital invested in the period. The variable accumulated profit—the sum of all the positive and negative profits you have so far achieved—allows you to calculate in each period the current level of your payoff from the experiment. (Don't forget, however, that the financial institution does not actually accumulate these profits and that this figure is only significant as the basis for calculating your experiment payoff.) By clicking on the corresponding key in the table you can call up a graph visualizing the numbers of each column.

### B.4 Concluding Remark.

One final note: There is no single suitable approach, and you can achieve good results in many different ways. However, chance also plays a significant role in individual success so that a below-average payoff does not necessarily imply that your intellectual performance was below-average, and vice versa.

Good luck!

## C. English Translation of the Experiment Instructions (Raw Format)

*Only Section 3 of the instructions differs in the raw format.*

### C.3 The Decision- and Information Interface.

#### C.3.1 The Decision Interface.

The following illustration (Figure C.1) is a screenshot of the decision interface. The grey area contains the balance sheet of the financial institution you are managing for a specific period. The number of the period can be found at the bottom right-hand edge of the screen. You can enter numbers directly in the corresponding fields of the balance sheet, with the exception of the fields *Equity Capital* and *Balance Sheet Total*. Under the balance sheet you will find five keys which will help you to draw up the balance sheet.

On the asset side, the balance sheet contains the fields *Investment Volume (A)*, *Investment Volume (B)* and *Reserves*. On the liabilities side, it contains the fields *Equity Capital* and *Debt Capital*. The equity capital is fixed at the beginning of each period and you cannot change the

equity for the current period. You can borrow any amount of debt capital between nil and the maximum amount available for that period. This amount is shown to the right of the debt capital field. You can enter the amount of debt capital you have chosen directly in the corresponding field. Similarly, you can fill the fields on the asset side with the amounts you have chosen. The balance sheet must balance, i.e. total assets must equal total liabilities.

You cannot fill in the fields *Balance Sheet Total* at the bottom of the balance sheet yourself, as they are automatically filled when you activate the *Update Balance Total* key, provided that all the fields of the balance sheet have been filled in and the total assets and total liabilities agree.

The screenshot shows a web-based decision interface for planning. At the top, there are two tabs: "Plan for the current period" (selected) and "Information about past periods". The main area is a form with two columns: "ASSETS" and "LIABILITIES".

| ASSETS                     |                      | LIABILITIES                |                                       |
|----------------------------|----------------------|----------------------------|---------------------------------------|
| Investment volume (A)      | <input type="text"/> | Equity capital             | <input type="text" value="100.0"/>    |
| Investment volume (B)      | <input type="text"/> | Debt capital               | <input type="text"/> (maximum: 300.0) |
| Reserves                   | <input type="text"/> |                            |                                       |
| <b>BALANCE SHEET TOTAL</b> | <input type="text"/> | <b>BALANCE SHEET TOTAL</b> | <input type="text"/>                  |

Below the form are four buttons: "Delete all entries", "Insert missing entry", "Calculator", and "Update balance sheet total". The "Proceed to the next period" button is highlighted in yellow and is located to the right of the "Update balance sheet total" button.

At the bottom left, there is an "ADMIN" button and a gear icon. At the bottom right, it says "Period 1 of 60".

Figure C.1: Screenshot of the decision interface (raw format).

The remaining four keys have the following functionality:

- The *Delete All Entries* key deletes all the numbers which you have entered.
- When you have already filled in three of the four fields Investment Volume (A), Investment Volume (B), Reserves and Debt Capital, the *Insert Missing Entry* function calculates the value for the missing field necessary to balance assets and liabilities and enters it in the appropriate field.
- Inserting the balance total by means of the *Update Balance Sheet Total* key activates the *Proceed to the Next Period* key and you can now implement your balance sheet. However, it is also possible to delete, change, etc. all your inputs as often as you want. Note that the *Proceed to the Next Period* key is deactivated as soon as you click on another field (with the exception of the calculator) after updating the balance sheet total.

- The *Calculator* provides the functions of a pocket calculator. If you want to calculate certain expressions repeatedly, you can place the calculator in the lower part of the screen and change only certain numbers each time. You can click on any place in the expression field of the calculator and change the number there while retaining the other numbers and press = to carry out the calculation. You can also keep several calculators open at the same time.

### C.3.2 The Information Page.

In addition to the decision interface, the experiment software also features a second interface providing access to your financial institution's business figures in past periods. You reach this interface by clicking on the tab *Information about Past Periods*. A table then appears displaying the period values of the following business figures. The first five columns after the period number contain the balance sheet volumes *Investment Volume (A)*, *Investment Volume (B)*, *Reserves*, *Debt Capital* and *Equity Capital*; the next column shows the period values for the debt equity ratio (i.e. debt capital taken divided by the equity available at the beginning of that period); in the subsequent five columns you will see the *Capital Repayments and Returns* in each of the categories A and B, the *Default Rates* in the categories A and B, and the *Total Capital Repayments and Returns* (see Equation B.2); in the last three columns you see the realizations of the success indicators *Return on assets (ROA)*, *Profit* and *Accumulated Profit*. The ROA is the profit from a period plus the interests divided by the total capital invested in the period. The variable accumulated profit—the sum of all the positive and negative profits you have so far achieved—allows you to calculate in each period the current level of your payoff from the experiment. (Don't forget, however, that the financial institution does not actually accumulate these profits and that this figure is only significant as the basis for calculating your experiment payoff.) By clicking on the corresponding key in the table you can call up a graph visualizing the numbers of each column.

## D. German Original of the Experiment Instructions (Goal Format)

### Experimentanleitung

Willkommen zum Experiment! Das heutige Experiment dauert in der Regel nicht mehr als eineinhalb Stunden. Davon entfällt etwa eine halbe Stunde auf einen Einführungsvortrag. Sie erfahren in diesem Vortrag, was Sie zu dem Experiment wissen müssen. Eine schriftliche Version des Vortrags liegt Ihnen vor. Beachten Sie, dass Sie diese Anleitung nach dem Experiment nicht mitnehmen dürfen. Sie können während des Vortrags Fragen stellen. Um gleiche Bedingungen für alle Versuchsteilnehmer zu gewährleisten, müssen wir uns aber darauf beschränken, Informationen nur in dem vorgesehenen Ausmaß an Sie weiterzugeben. Bitte verbleiben Sie nach Abschluß des Experiments auf Ihrem Platz bis eine Aufsichtsperson Ihren Payoff auf einer Quittung notiert hat und Sie zum Verlassen Ihres Platzes aufgefordert hat.

## D.1 Überblick

Der Kontext des heutigen Experiments ist eine Planungssituation eines Finanzinstituts. Stellen Sie sich vor, dass Sie ein Finanzinstitut leiten. Das Experiment geht über maximal 60 Perioden, in denen Sie jeweils Entscheidungen treffen. Ihre Spieldauer kann weniger als 60 Perioden betragen, denn es ist möglich, daß Ihr Finanzinstitut im Laufe der 60 Perioden insolvent wird. Tritt dies ein, so ist das Experiment für Sie beendet.

Ihre Aufgabe ist es, eine für Ihr Finanzinstitut aus finanzieller Sicht erfolgreiche Geschäftspolitik zu betreiben. Dementsprechend erhalten Sie einen erfolgsabhängigen Payoff, der sich an dem finanziellen Erfolg Ihrer Politik bemißt, und im Einzelnen wie folgt ausgestaltet ist:

- Falls das Finanzinstitut bis einschließlich der 60. Periode solvent geblieben ist, ist die Payoff-Basis, nach der sich Ihr erfolgsabhängiger Payoff bemißt, die Summe der Periodengewinne über die 60 Perioden. Beachten Sie, dass sich der Begriff Periodengewinn auch auf negative Zahlen, d.h. Verluste, beziehen kann.
- Falls das Finanzinstitut während des Experiments insolvent wurde, wird die Payoff-Basis auf 25% der Summe der Periodengewinne reduziert, wobei die erzielten Periodengewinne bis einschließlich der letzten gespielten Periode, also der Insolvenzperiode, in die Berechnung eingehen.

Falls die Payoff-Basis positiv ist, dann ist der Umrechnungsfaktor €0.05 pro Einheit. Anderenfalls ist Ihr erfolgsabhängiger Payoff €0. Für die Teilnahme erhalten Sie in jedem Fall zusätzlich einen Fixbetrag in Höhe von €8.

Sie spielen in dem heutigen Experiment nicht mit anderen oder gegen andere Versuchsteilnehmer. Ihre Entscheidungen haben keinerlei Einfluss auf die Entscheidungssituation anderer Teilnehmer und auch nicht auf die Experimentsauszahlung anderer Teilnehmer.

## D.2 Das Entscheidungsproblem

### D.2.1 Kapitalbestand und Kapitalaufnahme

Das Kapital des Finanzinstituts setzt sich zusammen aus **Eigenkapital** und **Fremdkapital**. Zu Beginn des Experiments ist die Höhe des Eigenkapitals 100 Einheiten und dieser Betrag wird niemals im Laufe des Experiments überschritten. Die Höhe des Eigenkapitals in der nächsten Periode kann jedoch von Gewinnen der gegenwärtigen Periode beeinflusst werden.

- Ist der Periodengewinn negativ, so wird das Eigenkapital des von Ihnen geleiteten Finanzinstituts in der nächsten Periode um diesen Betrag reduziert.
- Ein positiver Gewinn erhöht das Eigenkapital demgegenüber nur dann, wenn dieses unter den 100 Einheiten liegt. In diesem Fall wird der Gewinn zum Eigenkapital der nächsten Periode hinzugerechnet, allerdings nur in dem zur Wiederherstellung der 100 Einheiten erforderlichen Ausmaß. Der eventuell verbleibende Teil des Gewinns wird an die Anteilseigner ausgeschüttet.

In dem Experiment entsprechen den Anteilseignern keine Teilnehmer, die Gewinnausschüttung ist nur formal. Da in Ihre Payoff-Basis stets der Periodengewinn vor dem eventuellen Eigenkapitalausgleich und der Gewinnausschüttung eingeht, haben diese Vorgänge keine Bewandnis für den Beitrag der jeweiligen Periode zu Ihrer Payoff-Basis.

Fremdkapital kann in jeder Periode zu einem festen Zinssatz von 3.5% aufgenommen werden. Es kann nur für die Dauer einer Periode aufgenommen werden – am Ende jeder Periode muß der geliehene Betrag zuzüglich der Zinsen zurückgezahlt werden. Die maximale Höhe des zur Verfügung stehenden Fremdkapitals beträgt in jeder Periode das dreifache der gegenwärtigen Höhe des Eigenkapitals, jedoch mindestens 40 Einheiten. Sie können jeden Betrag an Fremdkapital bis zu dem maximal verfügbaren Betrag aufnehmen.

### D.2.2 Kapitalverwendung (Investitionsprojekte)

Ihr Finanzinstitut sieht sich einer Nachfrage nach Finanzierung für viele einzelne Investitionsprojekte gegenüber. Ihre operativen Abteilungen kategorisieren die Investitionsprojekte in eine von zwei Kategorien, genannt A und B, derart, dass Investitionsprojekte der gleichen Kategorie ähnlich oder gleich in ihrem Ausfallrisiko sind. Investitionsprojekte der Kategorie A haben ein geringeres Ausfallrisiko als Projekte der Kategorie B. Unter der Kategorie B von Projekten könnten Sie sich z.B. Finanzierung von start-up Unternehmen vorstellen. Dementsprechend haben Investitionsprojekte aus Kategorie B eine höhere nominale Rendite als Projekte der Kategorie A, und zwar  $r_A = 0.11$  (11%) und  $r_B = 0.25$  (25%). Wie beim Fremdkapital beträgt die Laufzeit der beiden Investitionskategorien ebenfalls nur eine Periode. Es gibt stets genügend Projekte um das Ihnen zur Verfügung stehende Kapital zu investieren.

Neben der Finanzierung von Investitionsprojekten kann Kapital auch als Reserve gehalten werden. Das als Reserve gehaltene Kapital bringt keine Verzinsung. Die Reserven werden am Ende jeder Periode aufgelöst.

### D.2.3 Ausfälle von Investitionsprojekten

Nicht alle der von Ihnen finanzierten Investitionsprojekte führen zum Erfolg – manche fallen aus. Bei einem Ausfall erhalten Sie keinerlei Rückflüsse aus dem betreffenden Investitionsprojekt. Da Ihr Kapital auf zahlreiche Projekte in der jeweiligen Kategorie verteilt wird, fällt immer nur ein gewisser Anteil des Investitionsvolumens aus. Als **Ausfallrate**  $d_i$  bezeichnen wir den Anteil des in Kategorie  $i$  investierten Kapital-Volumens, der in einer gegebenen Periode ausfällt.

$$d_i = \frac{\text{Ausgefallenes Volumen } (i)}{\text{Investiertes Volumen } (i)}, i \in A, B \quad (\text{D.1})$$

Eine Ausfallrate  $d_i$  bedeutet, dass  $d_i \cdot 100\%$  des in Kategorie  $i$  investierten Volumens ausgefallen ist.

Neben der Kategoriezuordnung hängen die Ausfallraten auch von dem in einer Periode vorherrschenden Zustand der Ökonomie ab. Es gibt zwei Zustände, den **normalen Zustand**, und den

Zustand einer **Krise**.

- Im normalen Zustand beträgt die Ausfallrate für Kategorie A im Mittel 6% und für Kategorie B im Mittel 14%, mit jeweils einer kleinen Varianz.
- Über die Ausfallraten im Krisenzustand ist Ihnen nur bekannt, dass sie für beide Kategorien um ein Vielfaches höher sind als im normalen Zustand. Dabei ist der Faktor, um den sich die Ausfallraten erhöhen, identisch für beide Kategorien. Dieser Anstiegsfaktor muss nicht ganzzahlig sein. Er verändert sich nicht über die Krisen hinweg. Da aber die Ausfallraten auch im Krisenzustand eine gewisse Varianz haben, können sich für die jeweilige Kategorie die Realisationen der Krisen-Ausfallrate von Krise zu Krise etwas unterscheiden.

Das Experiment ist so konfiguriert, dass Sie mit einer sehr hohen Wahrscheinlichkeit zumindest eine Krisenperiode im Verlauf des Experiments erleben; mehr als zwei Krisenperioden treten mit eher niedriger Wahrscheinlichkeit auf. Der Krisenzustand dauert nur eine Periode; es ist möglich, aber entsprechend unwahrscheinlich, dass sich zwei Krisen in zwei aufeinanderfolgenden Perioden einstellen.

Zum Zeitpunkt der Investitionsentscheidung für eine gewisse Periode ist Ihnen nicht bekannt, welcher Zustand sich in der betreffenden Periode einstellen wird. In unserem Experiment kündigt sich das Eintreten einer Krise in den vorherigen Perioden in keiner Weise an. Das Eintreten einer Krise hängt auch in keiner Weise von Ihren eigenen Entscheidungen im Laufe des Experiments ab. Ob sich der Krisenzustand eingestellt hat, können Sie erst zu Beginn der nachfolgenden Periode anhand der realisierten Ausfallraten beurteilen.

Den Zustand der Ökonomie ermittelt der Computer anhand eines Zufallsprozesses der für alle Teilnehmer identisch ist. Hier ist anzumerken, dass obwohl der Prozess für alle identisch ist, der Zustand der Ökonomie in einer Periode für jeden Teilnehmer einzeln bestimmt wird. Daher könnten Sie aus der Information, dass ein anderer Teilnehmer in einer gewissen Periode eine Krise erlebt hat, keinerlei relevante Information über Ihren eigenen Spielverlauf gewinnen. Unter allen Teilnehmern verteilen sich die Krisen etwa gleichmäßig über die Perioden.

#### **D.2.4 Rückflüsse, Gewinne und Insolvenz**

Im folgenden werden Ihnen die Formeln für die Berechnung der Rückflüsse, der Gewinne und die Insolvenzregel erläutert. Für die vergangenen Perioden werden die entsprechenden Größen von der Software ausgerechnet und auf der Informationsseite für Sie bereitgestellt. Diese Formeln können Sie nach Wunsch für das Nachrechnen der Größen auf der Informationsseite oder für Ihre Entscheidung verwenden.

Für Ausfallraten  $d_A$  und  $d_B$  ergeben sich die gesamten Kapital-Rückflüsse  $R(d_A, d_B)$  aus den Investitionsvolumina  $x_A$  und  $x_B$  und den nominalen Renditen  $r_A = 0.11$  und  $r_B = 0.25$  in der folgenden Weise:

$$R(d_A, d_B) = x_A \cdot 1.11 \cdot (1 - d_A) + x_B \cdot 1.25 \cdot (1 - d_B). \quad (\text{D.2})$$

Damit ergibt sich der **Gewinn** bei Ausfallraten  $d_A$  und  $d_B$  aus den entsprechenden Rückflüssen zuzüglich der gehaltenen Reserven  $x_{Res}$  abzüglich der Zahlungsverpflichtungen aus Fremdkapitalaufnahme und abzüglich des zu Beginn der Periode vorhandenen Eigenkapitals wie folgt:

$$\Pi(d_A, d_B) = R(d_A, d_B) + x_{Res} - FK \cdot 1.035 - EK. \quad (D.3)$$

Solvenz liegt vor, solange das Eigenkapital zur Deckung von Verlusten ausreicht, d.h.

$$EK + \Pi \geq 0. \quad (D.4)$$

Falls sich Insolvenz einstellt am Ende einer Periode **ist das Experiment für Sie beendet**. Beachten Sie, dass sich die Solvenzbedingung D.4 auf die jeweiligen Periodenwerte bezieht und vorhergehende Gewinne nicht abfedernd wirken.

### D.3 Ablauf der Periodenentscheidung

Sie erfahren nun im Detail, wie die Investitions- und Finanzierungsstruktur Ihres Finanzinstituts für eine Periode festgelegt wird, d.h. die Volumina für die Kategorien A und B, sowie die Reserven und die Höhe des Fremdkapitals. Diese Größen werden von Ihnen nicht direkt festgelegt, sondern ergeben sich indirekt, indem Sie Vorgaben bzgl. Gewinn und Sicherheit erstellen, die Ihr Finanzinstitut in der aktuellen Periode erreichen soll.

- Die Experimentsoftware überprüft, ob Ihre Vorgaben machbar sind und informiert Sie, inwieweit Verbesserungsspielraum in den einzelnen Vorgaben besteht. Falls ein Verbesserungsspielraum besteht, können Sie diesen gemäß Ihrer Prioritäten ausschöpfen.
- Die Experimentsoftware ermittelt dann automatisch diejenige Investitions- und Finanzierungsstruktur, die Ihre Vorgaben für die gegebene Periode realisiert.

Sie können sich die Experimentsoftware als eine operative Abteilung vorstellen, die in jeder Periode für Sie die Realisierbarkeit Ihrer Vorgaben überprüft und Ihre schließlich festgelegten Vorgaben in eine entsprechende Investitions- und Finanzierungsstruktur übersetzt.

#### D.3.1 Erstellung von Vorgaben

Sie erstellen in jeder Periode Vorgaben bezüglich dreier Größen, indem Sie Vorgabenwerte in die entsprechenden Felder der Entscheidungsoberfläche eingeben (siehe Abbildung D.1). Unterhalb dieser Felder sehen Sie stets das in der aktuellen Periode vorhandene Eigenkapital.

Plan für die gegenwärtige Periode    Informationen über vergangene Perioden

**Ihre Vorgaben**

**Normalgewinn:**  
Welcher Gewinn soll in der aktuellen Periode mindestens erreicht werden, falls sich der normale Zustand einstellt?  GE

**Krisengewinn:**  
Welcher Gewinn soll in der aktuellen Periode mindestens erreicht werden, falls sich der Krisenzustand einstellt?  GE

**Anstiegsfaktor:**  
Mit welchem Anstiegsfaktor der Ausfallraten soll für den Krisenzustand höchstens gerechnet werden?

Höchstausrfallrate A:   
Höchstausrfallrate B:

Eigenkapitalausstattung in der aktuellen Periode: 100.00

Machbarkeit prüfen    In die nächste Periode

ADMIN    Periode 1 von 60

Abbildung D.1: Screenshot der Entscheidungsoberfläche

Die drei vorzugebenden Größen sind:

- **Normalgewinn:** Gewinn, der in der aktuellen Periode mindestens erreicht werden soll, falls sich der normale Zustand einstellt

Sie sehen anhand von Gleichung D.3, dass der Gewinn von den Ausfallraten abhängt – eine Gewinnvorgabe kann daher nur unter der Annahme gewisser Ausfallraten gemacht werden. Bei Ihrer Vorgabe an den Normalgewinn rechnet die Planungsabteilung mit den bekannten mittleren Ausfallraten des normalen Zustands ( $d_A = 0.06$  und  $d_B = 0.14$ , d.h. 6% und 14%). Wenn sich in der betreffenden Periode der normale Zustand realisiert hat, wird der realisierte Gewinn typischerweise etwas von Ihrem Vorgabenwert abweichen, da die realisierten Ausfallraten etwas von den jeweiligen mittleren Werten abweichen. Wenn sich in der betreffenden Periode der Krisenzustand realisiert hat, wird Ihr Vorgabenwert für den Normalgewinn deutlich verfehlt werden, da die Ausfallraten dann um ein Vielfaches höher sind.

- **Krisengewinn:** Gewinn, der in der aktuellen Periode mindestens erreicht werden soll, falls sich der Krisenzustand einstellt

Ihr Vorgabenwert für den Krisengewinn kann durchaus negativ sein. Dies ist dann gleichbedeutend mit der Vorgabe, den Verlust im Falle einer Krise einen bestimmten Wert nicht übersteigen zu lassen. Beachten Sie, dass gemäß Gleichung D.4 bei einem Eigenkapital von

100 der Krisengewinn größer oder gleich  $-100$  sein muss, um die Solvenz in der betreffenden Periode zu sichern (nicht vergessen: größer als  $-100$  ist zum Beispiel  $-95!$ ).

Wie beim Normalgewinn kann eine Vorgabe an den Krisengewinn nur unter der Annahme gewisser Ausfallraten gemacht werden. Während jedoch für den Normalzustand die Ausfallraten aus Erfahrung bekannt sind, weiss die Planungsabteilung nicht, wie hoch sie diese im Krisenzustand ansetzen soll. Daher braucht die Planungsabteilung für die Implementierung Ihres Vorgabenwertes an den Krisengewinn noch die Vorgabe, mit welchem Anstieg der Ausfallraten sie für den Krisenzustand höchstens rechnen soll. Daher richtet sich die dritte Vorgabe an die Größe

- **Anstiegsfaktor:** *Darunter verstehen wir den Faktor der Vervielfachung der Ausfallraten des Normalzustands, mit dem für den Krisenzustand höchstens gerechnet werden soll.*

Zum Beispiel: Soll höchstens mit einer Verdoppelung der Ausfallraten gerechnet werden, dann wäre der Anstiegsfaktor 2; soll höchstens mit einer Verdreifachung gerechnet werden, wäre er drei, usw. Der Faktor muss aber nicht ganzzahlig sein. Die Software zeigt nach Eingabe des anzunehmenden Anstiegsfaktors automatisch die sich ergebenden Höchstaufallraten in den zwei unmittelbar darunterliegenden Feldern an (so sind z.B. bei einem Anstiegsfaktor von 2 die anzusetzenden Höchstaufallraten 12% für A und 28% für B; bei einem Anstiegsfaktor von 3 sind die entsprechenden Werte 18% für A und 42% für B, usw.).

Sie können mit der Vorgabe bestimmter anzusetzender Höchstaufallraten die tatsächlichen Ausfallraten in einer Krise natürlich nicht beeinflussen, denn diese werden auf der makroökonomischen Ebene bestimmt!

Schließlich noch eine wichtige Anmerkung über die Beziehung zwischen Ihren Vorgaben an den Krisengewinn und an die Höchstaufallraten:

- Fällt in einer Krise mehr aus als die angesetzten Höchstaufallraten, wird der realisierte Gewinn kleiner sein als Ihr Vorgabenwert an den Krisengewinn – d.h. Ihre Vorgabe für den Krisengewinn wird nicht eingehalten.
- Fällt in einer Krise weniger aus als die angesetzten Höchstaufallraten, wird der Gewinn sogar größer sein als Ihr Vorgabenwert für den Krisengewinn. Ihre Vorgabe an den Krisengewinn wird also noch übertroffen.

Damit ist Ihre Vorgabe an den Krisengewinn umso robuster, je höher die gemäß Ihrer Vorgabe anzusetzenden Höchstaufallraten. Wenn Sie beispielsweise einen Komplettausfall aller Investitionen in der Kategorie B als Planungsgrundlage vorgeben – was einem Anstiegsfaktor von 7.1 entspricht – wird Ihr Vorgabenwert für den Krisengewinn immer erreicht, denn die realisierten Ausfallraten in beiden Kategorien können dann nicht höher sein.

### D.3.2 Überprüfung der Machbarkeit Ihrer Vorgaben und eines eventuellen Verbesserungsspielraums

Sie können natürlich nicht gleichzeitig beliebig hohe Vorgaben an die Sicherheit und den Gewinn Ihres Finanzinstituts stellen. Auch bedingen sich die drei Vorgabenwerte gegenseitig. So gilt beispielsweise, dass je größer Ihre Vorgabe an den Krisengewinn, desto kleiner die Gewinnmöglichkeiten im normalen Zustand (bei festgehaltener Vorgabe an den Anstiegsfaktor der Ausfallraten). Ebenso gilt, dass je größer der von Ihnen vorgegebene Anstiegsfaktor, desto kleiner die Gewinnmöglichkeiten im normalen Zustand (bei festgehaltener Vorgabe an den Krisengewinn). Diese Zusammenhänge entstehen dadurch, dass höhere Vorgaben an Sicherheit mit einer Bilanz einhergehen, die eine geringere Fremdkapitalaufnahme und/oder weniger Investitionen in die riskantere, aber im Normalzustand rentablere Kategorie B beinhaltet.

Für die von Ihnen gewählten Vorgabenwerte stellt sich daher zunächst die Frage, ob sie **gemeinsam** machbar sind, d.h. ob – gegeben das verfügbare Kapital und die Investitionsalternativen – eine Bilanz existiert, die alle Vorgaben gemeinsam erfüllt. Es ist möglich, dass alle Ihre Vorgaben gemeinsam machbar sind und sogar noch Spielraum besteht, eine oder mehrere der Vorgaben zu erhöhen, ohne die übrigen senken zu müssen. Diese Überprüfung der Machbarkeit und einer eventuellen Verbesserbarkeit erfolgt automatisch durch die Software, wenn Sie auf die gelbe Taste *Machbarkeitsprüfung* klicken. Sie erhalten dann eine von 3 möglichen Rückmeldungen:

- *Ihre Vorgabenwerte sind nicht gemeinsam machbar*

In diesem Fall müssen Sie einen oder mehrere Vorgabenwerte verändern, und das neue Vorgabensystem erneut einer Machbarkeitsprüfung unterziehen.

- *Alle Vorgabenwerte können gleichzeitig erfüllt werden, und es ist noch Spielraum vorhanden mindestens einen der Vorgabenwerte zu verbessern*

Sie können für jede der Vorgaben den eventuell vorhandenen Spielraum durch Betätigen der entsprechenden Taste in der Dialogbox erfragen. Beachten Sie, daß die Ermittlung der höchsten Werte für jeden Vorgabenwert einzeln erfolgt, und zwar so, dass die jeweils anderen Vorgabenwerte eingehalten werden. Das impliziert, dass nicht alle drei Vorgaben gleichzeitig auf die jeweils angegebenen höchsten Werte gesetzt werden können. Wenn Sie den Wert in einer Vorgabe ein Stück in Richtung des angegebenen höchsten Wertes verändern, wird dies typischerweise den Verbesserungsspielraum für die anderen Vorgabenwerte verringern. Wenn Sie keinen Verbesserungsspielraum mehr erfragen möchten, gehen Sie zurück zu der Eingabeoberfläche und verändern Ihre Vorgabenwerte nach Ihren Wünschen.

- *Ihre Vorgabenwerte können gleichzeitig erfüllt werden und es ist kein Spielraum für Verbesserung der Werte vorhanden*

In diesem Fall wird das Feld *In die nächste Periode* aktiviert, und durch dessen Betätigung erfolgt der Übergang in die nächste Periode, wobei die Software die Realisationen aller

Geschäftszahlen ermittelt. Sie können aber auch Ihre Vorgabenwerte nochmal überdenken und verändern.

**Beachten Sie, dass Sie nur ausgehend vom dritten Fall in die nächste Periode gelangen können.**

### **D.3.3 Die Informationsoberfläche**

Neben der Oberfläche für Ihre Entscheidungseingabe bietet Ihnen die Experimentsoftware mit einer zweiten Oberfläche Einsicht in die Geschäftszahlen Ihres Finanzinstituts in den vergangenen Perioden. Sie gelangen auf diese Oberfläche durch einen Klick auf die Registerkarte *Informationen über vergangene Perioden*. Es erscheint dann eine Tabelle. Die ersten drei Spalten nach der Periodennummer enthalten die von Ihnen spezifizierten Vorgabenwerte in den einzelnen Perioden. Die folgende Spalte zeigt die Periodenwerte von *Eigenkapital*; in den folgenden sechs Spalten sehen Sie die jeweiligen Periodenwerte der *Ausfallraten* in den Kategorien A und B, der gesamten Kapital-Rückflüsse gemäß Gleichung D.2, der *Gesamtkapitalrendite (GKR)*, des *Gewinns* und des *Akkumulierten Gewinns*. Die GKR ist der Gewinn einer Periode zuzüglich der Zinsbelastung, geteilt durch das in der Periode eingesetzte Gesamtkapital. Die Größe akkumulierter Gewinn – die Summe der bis dahin von Ihnen erwirtschafteten positiven und negativen Gewinne – erlaubt es Ihnen in jeder Periode den aktuellen Stand Ihres Payoffs aus dem Experiment zu berechnen (Vergessen Sie aber nicht, dass das Finanzinstitut diese Gewinne nicht akkumuliert und diese Größe nur als Berechnungsbasis Ihres Payoffs eine Rolle spielt). Die Zahlen jeder Spalte können Sie durch einen Klick auf die entsprechende Taste in der Tabelle auch als Graphik sehen.

## **D.4 Schlussanmerkung**

Schließlich noch das Folgende: Es gibt nicht das einzig geeignete Vorgehen, und Sie können gute Ergebnisse auf vielerlei Weisen erzielen. Der Zufall spielt jedoch auch eine bedeutende Rolle für den individuellen Erfolg, so daß eine unterdurchschnittliche Auszahlung nicht notwendig auf eine unterdurchschnittliche Leistung zurückzuführen ist, und umgekehrt.

Viel Erfolg!

## **E. German Original of the Experiment Instructions (Raw Format)**

*Only Section 3 of the instructions differs in the raw format.*

### **E.3 Die Eingabe- und Informationsoberfläche**

#### **E.3.1 Die Eingabeoberfläche**

Die folgende Abbildung ist eine Bildschirmansicht der Eingabeoberfläche. Das graue Feld enthält die Bilanz des von Ihnen geleiteten Finanzinstituts für eine gewisse Periode. Die Nummer der Periode finden Sie am rechten unteren Rand des Bildschirms. Sie können Zahlen direkt in die Felder

der Bilanz eingeben, mit Ausnahme der Felder *Eigenkapital* und *Bilanzsumme*. Unter der Bilanz finden Sie fünf Tasten, die Ihnen bei der Implementierung Ihrer Entscheidungen behilflich sind.

The screenshot shows a web-based financial planning interface. At the top, there are two tabs: "Plan für die gegenwärtige Periode" (selected) and "Informationen über vergangene Perioden". The main area is divided into two columns: "AKTIVA" on the left and "PASSIVA" on the right. Under "AKTIVA", there are three input fields: "Investitionsvolumen (A)", "Investitionsvolumen (B)", and "Barreserve". Under "PASSIVA", there are two input fields: "Eigenkapital" (with a value of 100.00) and "Fremdkapital" (with a note "(maximal: 300.00)"). At the bottom of the input area, there are two "BILANZSUMME" fields, one under each column. Below these fields is a control bar with three buttons: "Alle Einträge löschen", "Fehlenden Eintrag ergänzen", and "Rechner". At the very bottom of the control bar are two yellow buttons: "Aktualisiere Bilanzsumme" and "In die nächste Periode". The interface also includes an "ADMIN" button on the bottom left and "Periode 1 von 60" on the bottom right.

Abbildung E.1: Bildschirmansicht der Eingabeoberfläche

Die Bilanz enthält auf der Aktiva-Seite die Felder *Investitionsvolumen (A)*, *Investitionsvolumen (B)* und *Barreserve*. Auf der Passiva-Seite enthält sie die Felder *Eigenkapital* und *Fremdkapital*. Das Eigenkapital ist zu Beginn jeder Periode vorgegeben und Sie können das Eigenkapital für die jeweils aktuelle Periode nicht verändern. Sie können jeden Betrag an Fremdkapital aufnehmen, der zwischen Null und dem für die jeweilige Periode maximal verfügbaren Betrag liegt. Dieser Betrag wird rechts neben dem Feld *Fremdkapital* angezeigt. Die Höhe des von Ihnen gewählten Fremdkapitals können Sie direkt in das entsprechende Feld eingeben. Ebenso können Sie die Felder auf der Aktiva-Seite mit den von Ihnen gewählten Beträgen ausfüllen. Die Bilanz muß ausgeglichen sein, d.h. die Summe der Aktiva muß gleich der Summe der Passiva sein.

Das unterste Feld der Bilanz, das Feld *Bilanzsumme* unter den Aktiva und den Passiva, kann nicht eigenständig mit Zahlen gefüllt werden, sondern wird automatisch beim Betätigen der Taste *Aktualisiere Bilanzsumme* ausgefüllt, sofern alle Felder der Bilanz ausgefüllt sind und die Summe der Aktiva und der Passiva übereinstimmen. Die übrigen 4 Tasten haben die folgende Funktionalität:

- Die Taste *Alle Einträge löschen* löscht alle von Ihnen eingefügten Zahlen.
- Wenn Sie bereits drei der Felder *Investitionsvolumen (A)*, *Investitionsvolumen (B)*, *Barreserve* und *Fremdkapital* ausgefüllt haben, berechnet die Funktion *Fehlenden Eintrag ergänzen* das

fehlende Feld derart, dass die Bilanz ausgeglichen ist, und fügt den fehlenden Wert ein.

- Sobald Sie mit der Taste *Aktualisiere Bilanzsumme* die Bilanzsumme eingefügt haben, wird die Taste *In die nächste Periode* aktiviert, und Sie können nun Ihre Bilanz implementieren. Sie können aber auch alle Eingaben beliebig oft löschen, verändern usw. Beachten Sie, dass die Taste *In die nächste Periode* wieder deaktiviert wird, sobald Sie nach der Aktualisierung der Bilanzsumme in ein anderes Feld klicken (mit Ausnahme des Rechners).
- Der *Rechner* bietet die Funktionen eines Taschenrechners. Wenn Sie gewisse Ausdrücke wiederholt berechnen möchten, können Sie den Rechner im unteren Teil des Bildschirms plazieren und jeweils nur gewisse Zahlen verändern. Sie können an jeder Stelle in das Ausdrucksfeld des Rechners klicken und die dort stehende Zahl unter Beibehaltung der übrigen Zahlen verändern und dann auf = drücken um die Berechnung durchzuführen. Sie können auch mehrere Rechner gleichzeitig offen halten.

### E.3.2 Die Informationsoberfläche

Neben der Oberfläche für Ihre Entscheidungseingabe bietet die computerisierte Schnittstelle Ihnen mit einer zweiten Oberfläche die Möglichkeit zum Abrufen von Informationen über vergangene Perioden. Sie gelangen auf diese Oberfläche durch einen Klick auf die Registerkarte *Informationen über vergangene Perioden*.

Es erscheint dann eine Tabelle mit den Periodenwerten der folgenden Geschäftszahlen Ihres Finanzinstituts: in den ersten fünf Spalten nach der Periodennummer die Bilanzgrößen *Investitionsvolumen (A)*, *Investitionsvolumen (B)*, *Barreserve*, *Eigenkapital* und *Fremdkapital*; in der sechsten Spalte der *Verschuldungsgrad* (d.h. das aufgenommene Fremdkapital geteilt durch das am Anfang der Periode vorhandene Eigenkapital); in den folgenden fünf Spalten sehen Sie die *Rückflüsse* in den Kategorien A und B (d.h. die jeweiligen Beträge der Kapitalrückzahlung samt Rendite), die zugehörigen *Ausfallraten* in den Kategorien A und B, sowie die gesamten Kapital-Rückflüsse (gemäß Gleichung D.2); in den letzten drei Spalten sehen Sie Ihre Realisationen der Erfolgskennzahlen *Gesamtkapitalrendite (GKR)*, *Gewinn* und *Akkumulierter Gewinn*. Die GKR ist der Gewinn einer Periode zuzüglich der Zinsbelastung, geteilt durch das in der Periode eingesetzte Gesamtkapital. Die Größe akkumulierter Gewinn – die Summe der bis dahin von Ihnen erwirtschafteten positiven und negativen Gewinne – erlaubt es Ihnen in jeder Periode den aktuellen Stand Ihres Payoffs aus dem Experiment zu berechnen (Vergessen Sie aber nicht, dass das Finanzinstitut diese Gewinne nicht akkumuliert und diese Größe nur als Berechnungsbasis Ihres Payoffs eine Rolle spielt). Die Zahlen jeder Spalte können Sie durch einen Klick auf die entsprechende Taste in der Tabelle auch als Graphik sehen.
